# Supplementary material for: Influence of Lipid Profiles on Type 2 Diabetes Risk in Nigerian Patients
Source: Research Square preprint supplement (doi:10.21203/rs.3.rs-5267986/v1), 2024-11-08
Supplement: Supplementary file 1 [file 38a6e1fd259e939359d75152.docx]

**Influence of Lipid Profiles on Type 2 Diabetes Risk in Nigerian Patients**

**Supplementary Figures**


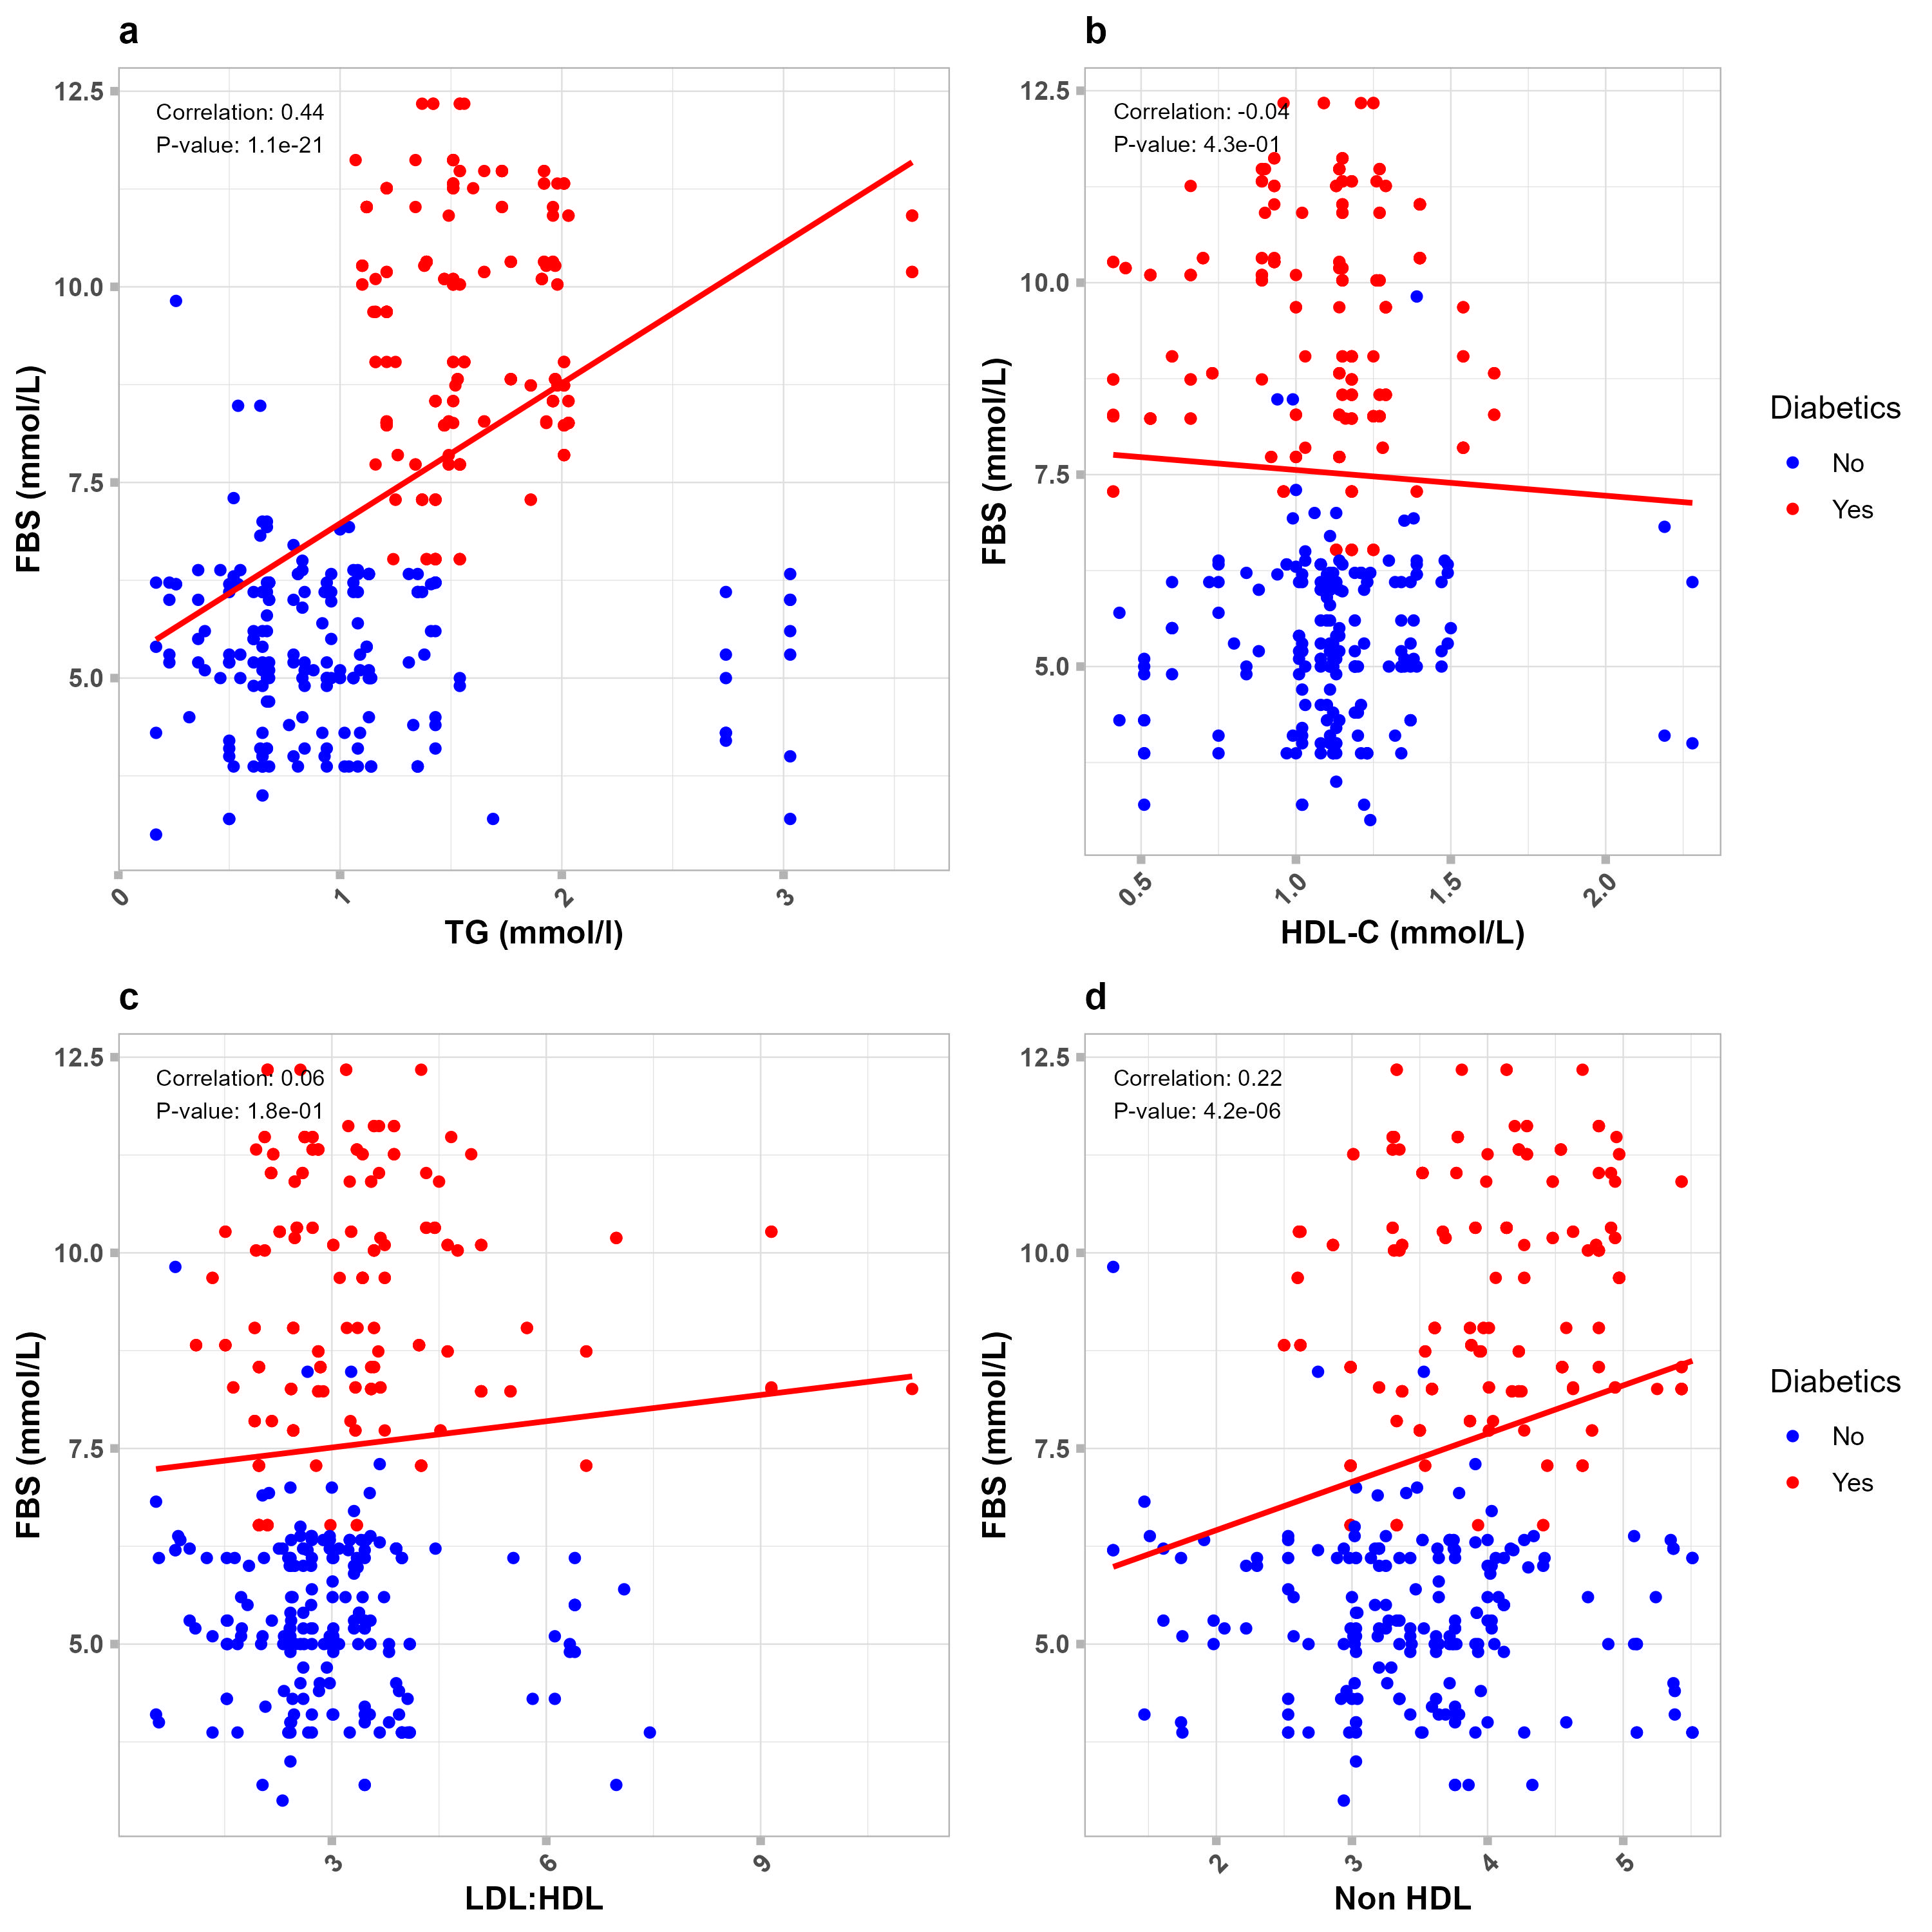


**Fig.1a. Showing the correlation between type-2 diabetes as measured by FBS and some lipids at the optimum level of LDL-c**


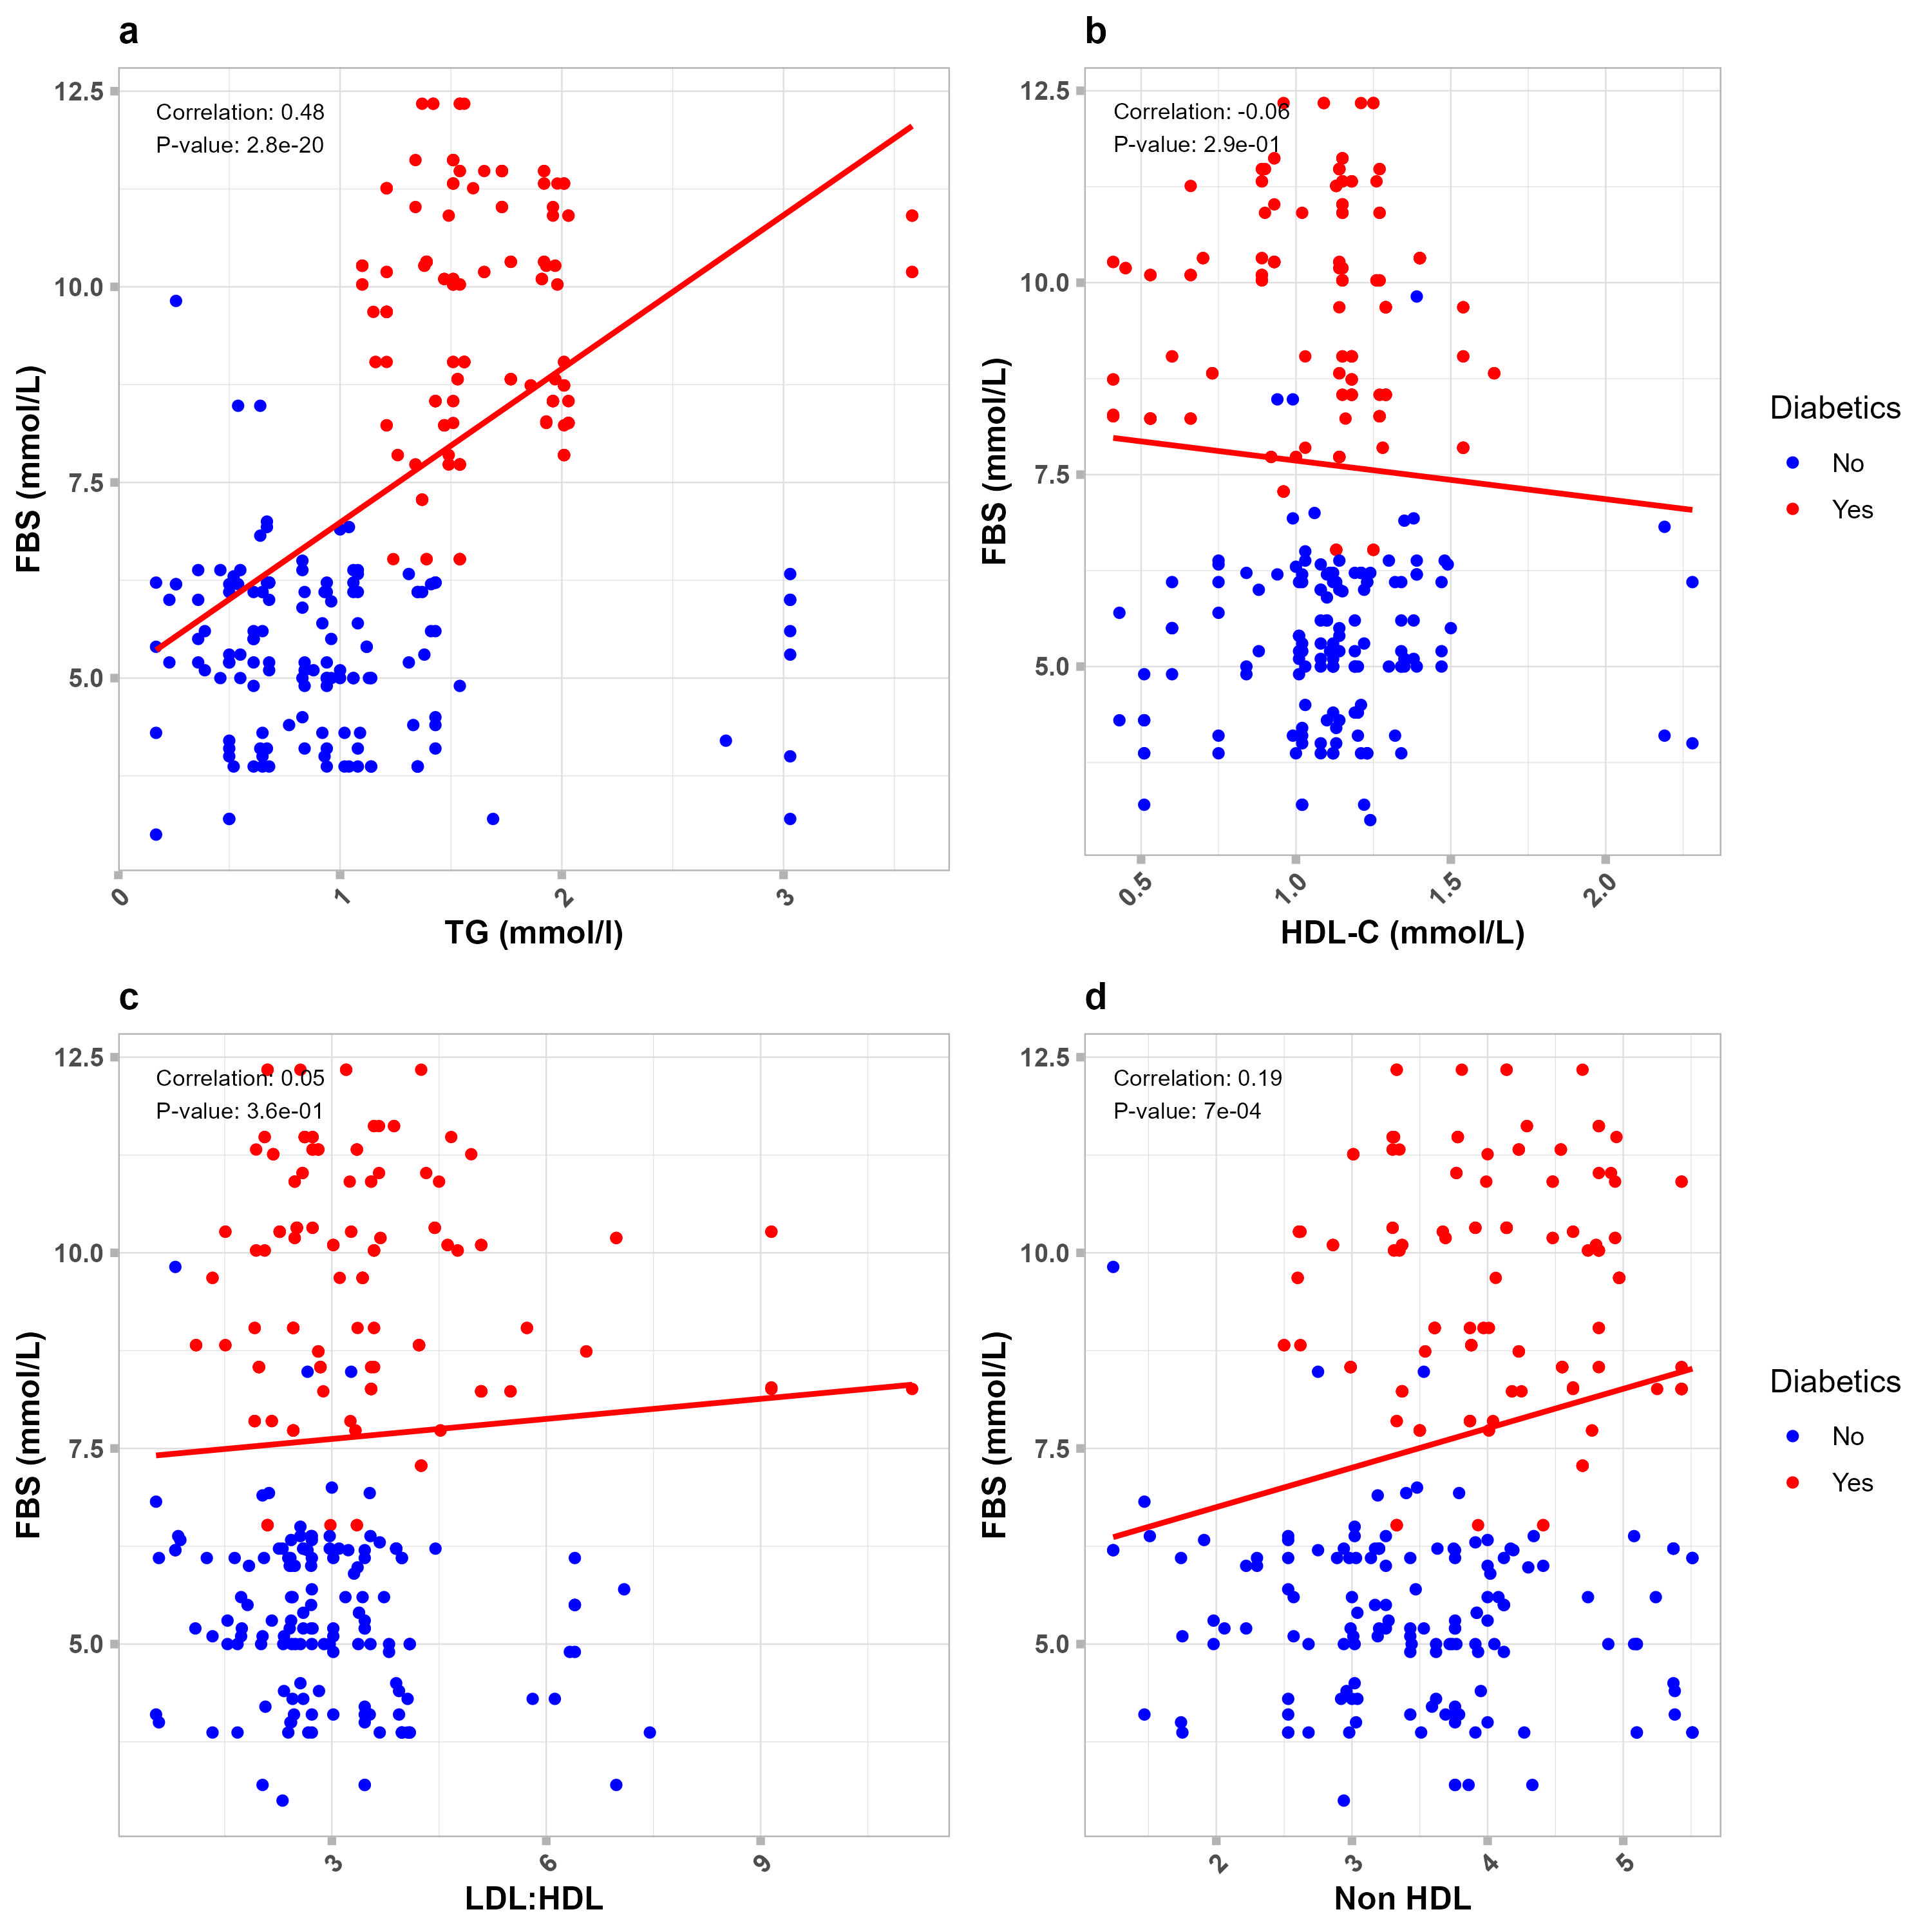


**Fig.1b. Showing the correlation between type-2 diabetes (in Female Patients) as measured by FBS and some lipids at the optimum level of LDL-c**


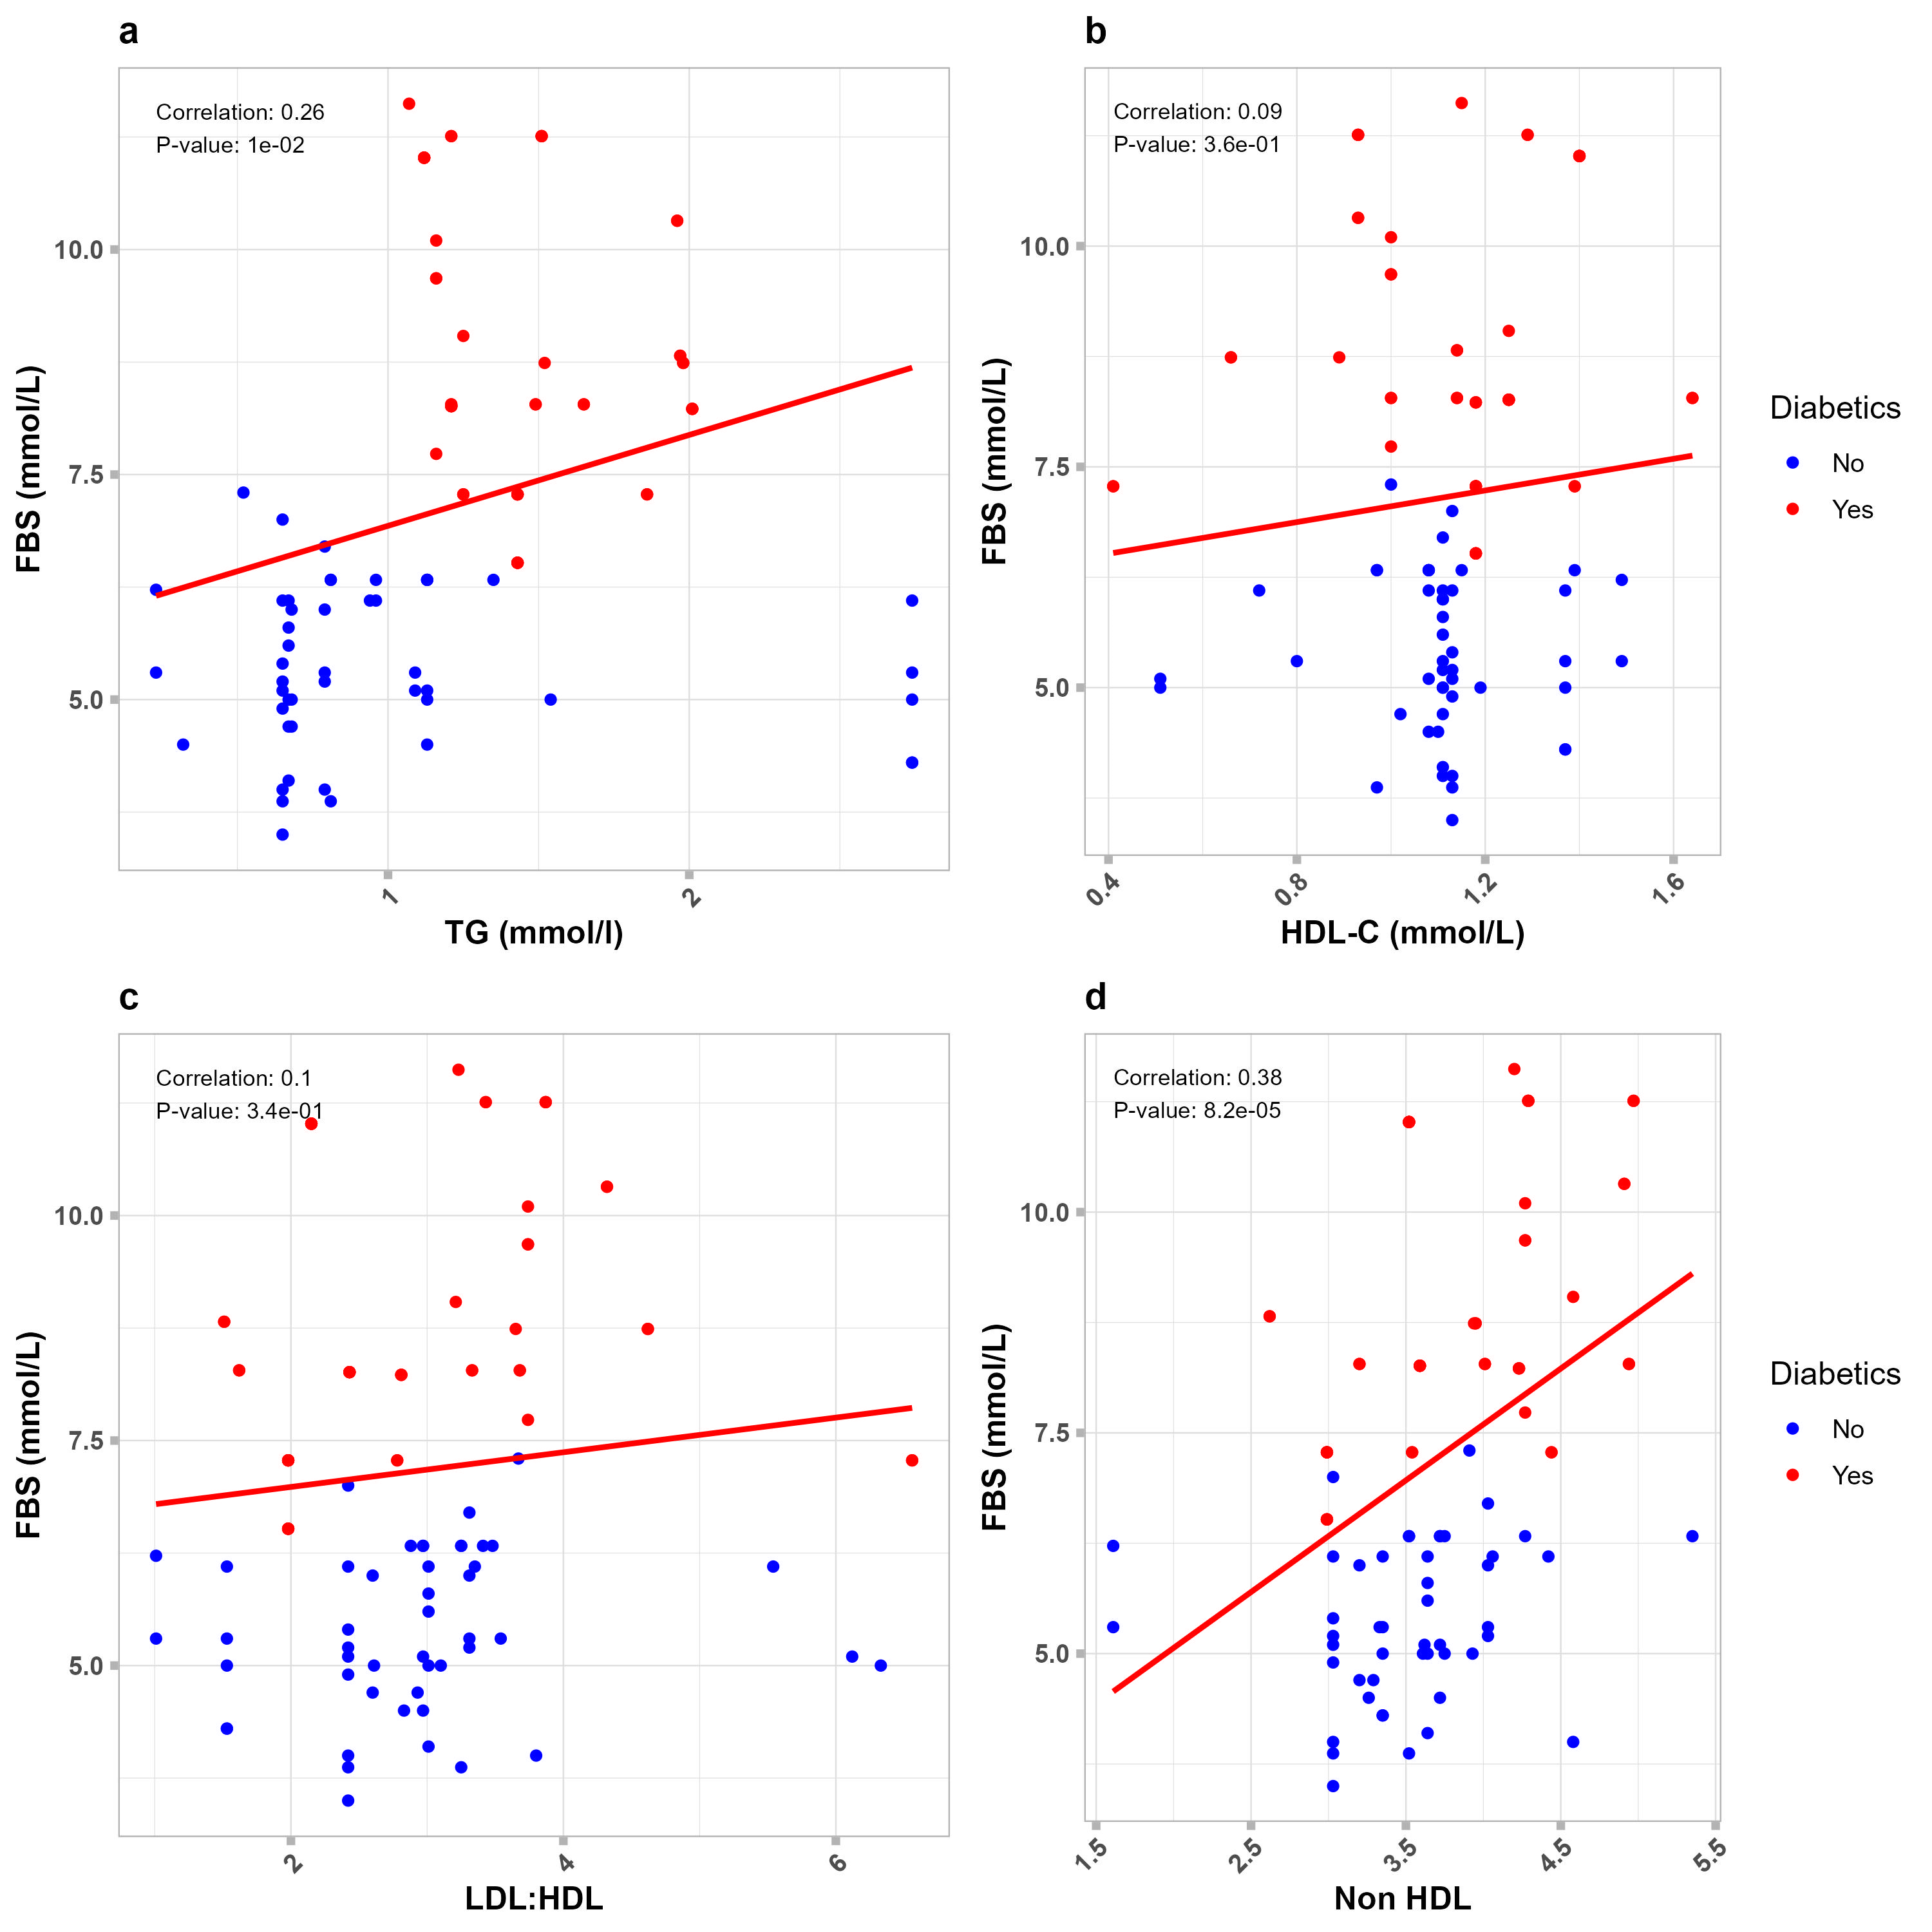


**Fig.1c. Showing the correlation between type-2 diabetes (in Male Patients) as measured by FBS and some lipids at the optimum level of LDL-c**


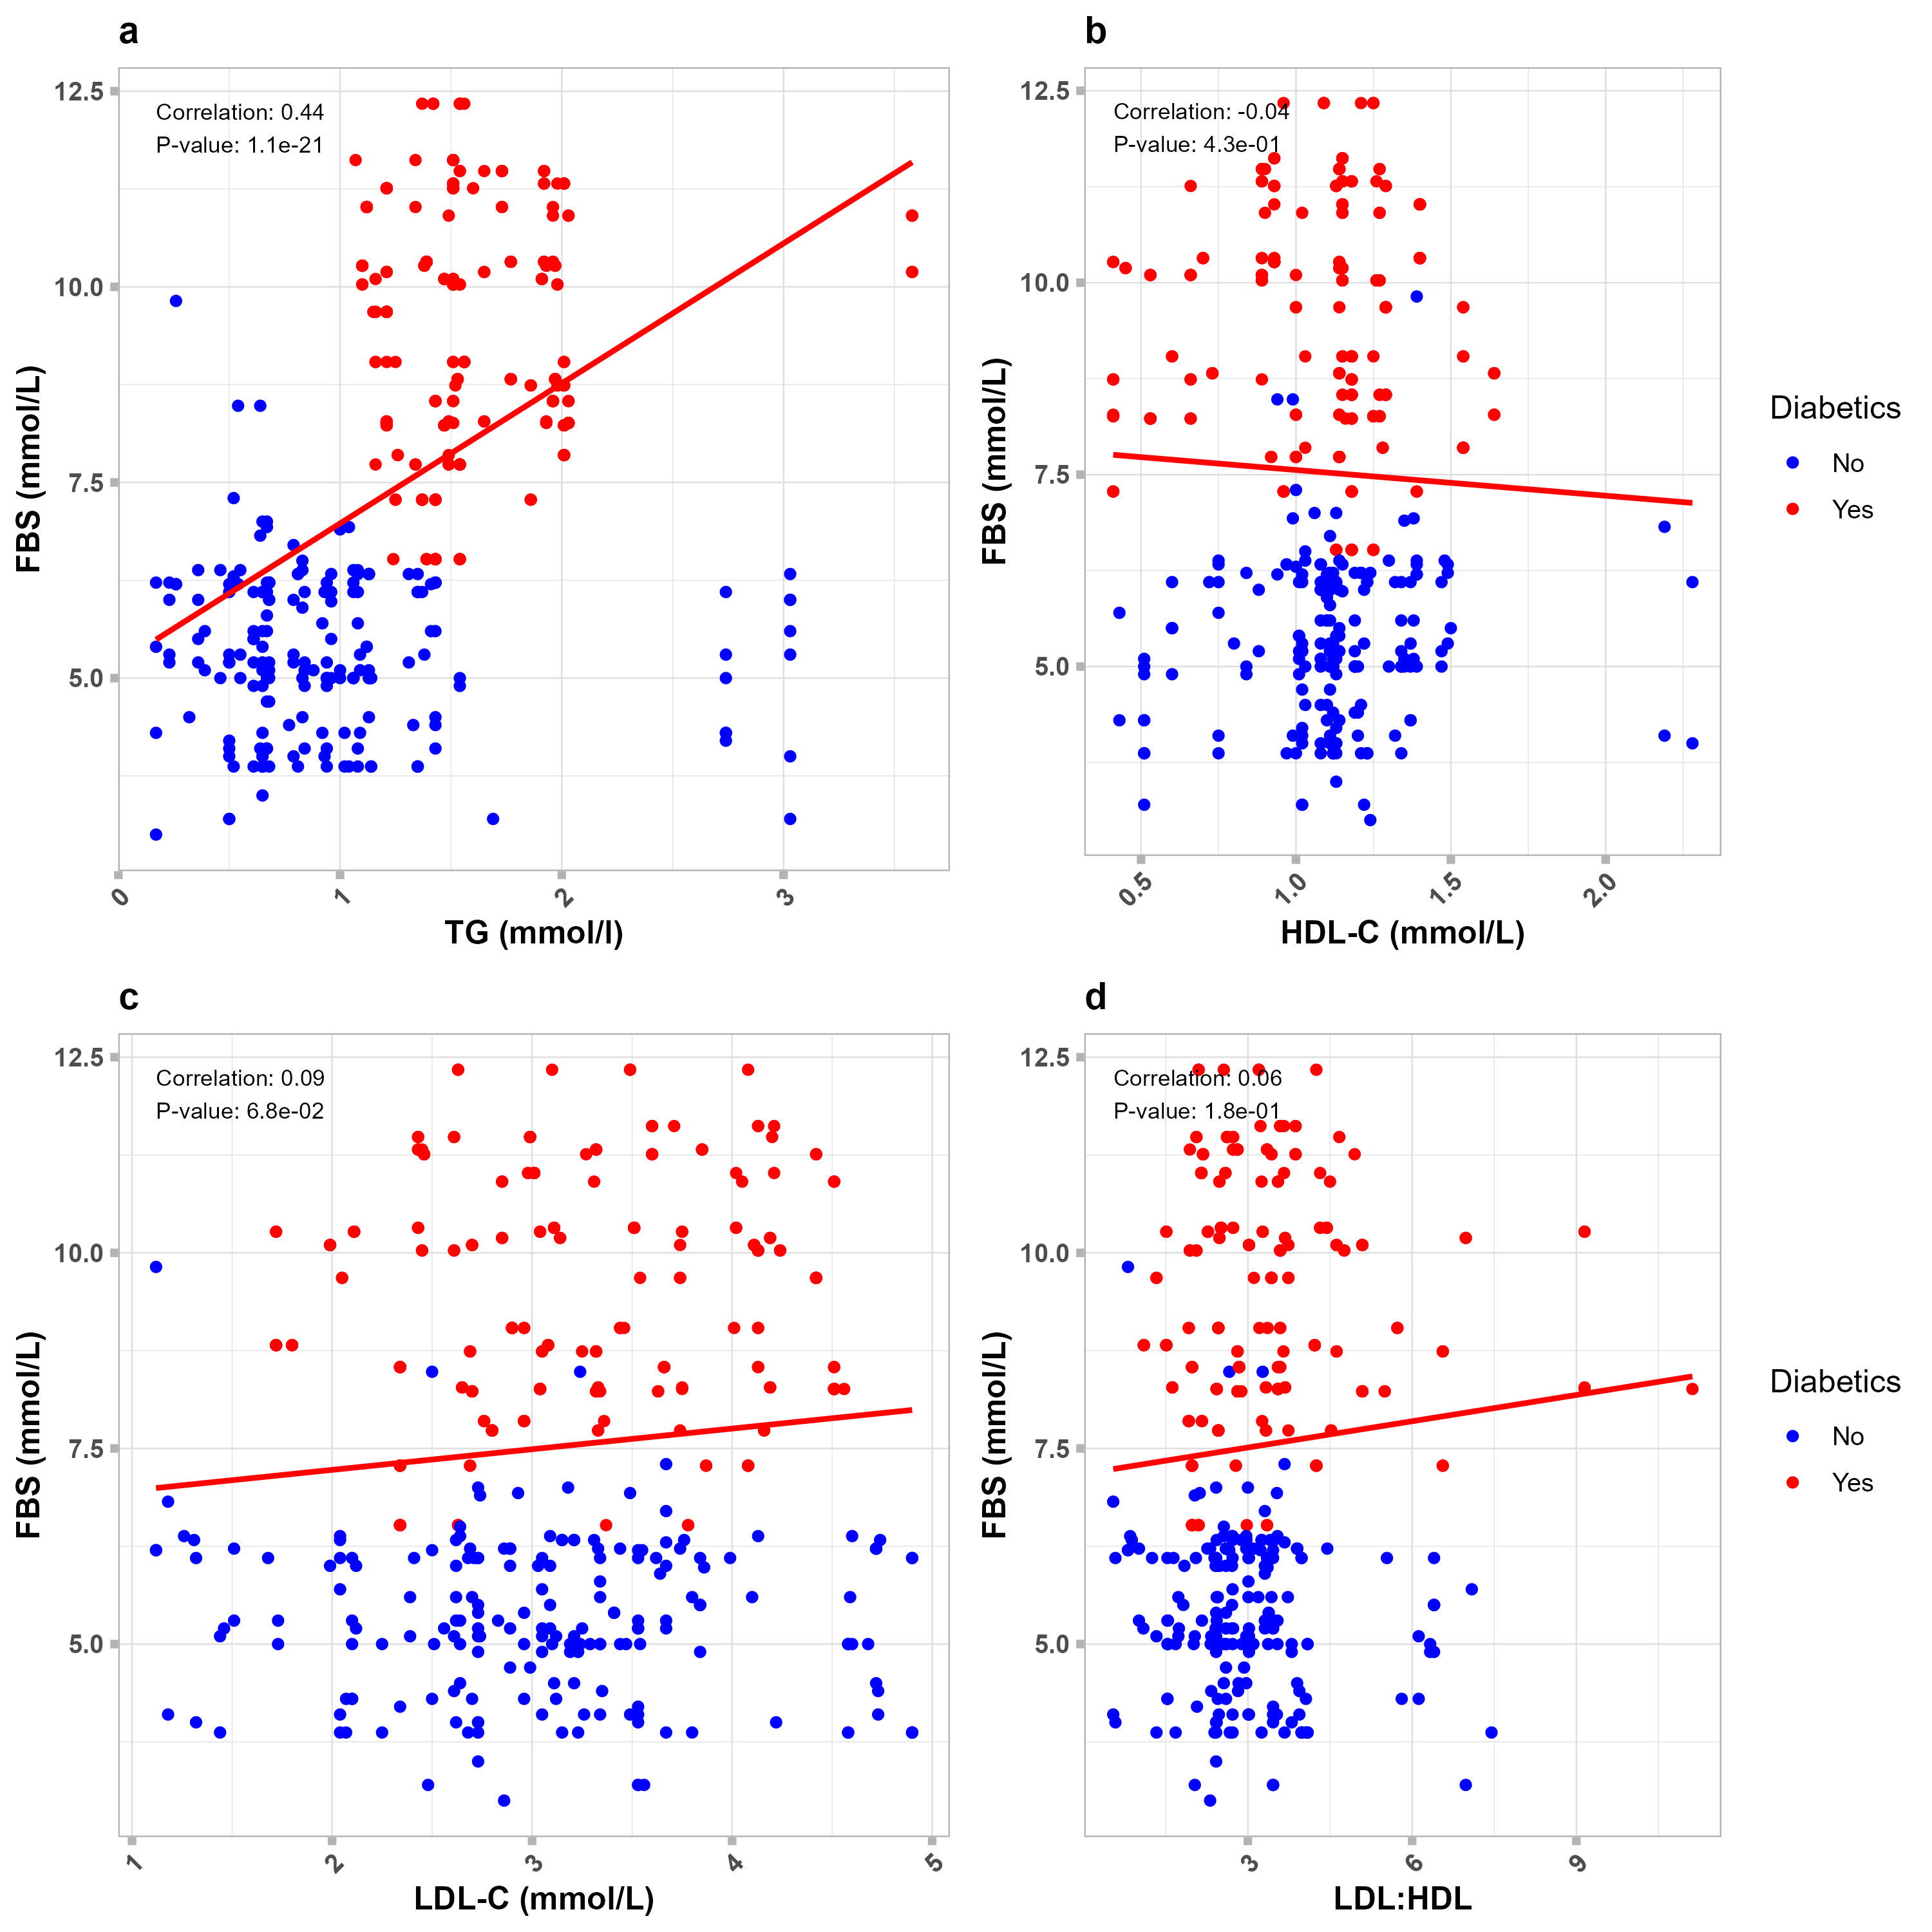


**Fig.2a. Showing the correlation between type-2 diabetes as measured by FBS and some lipids at the optimum level of Non-HDL-c**


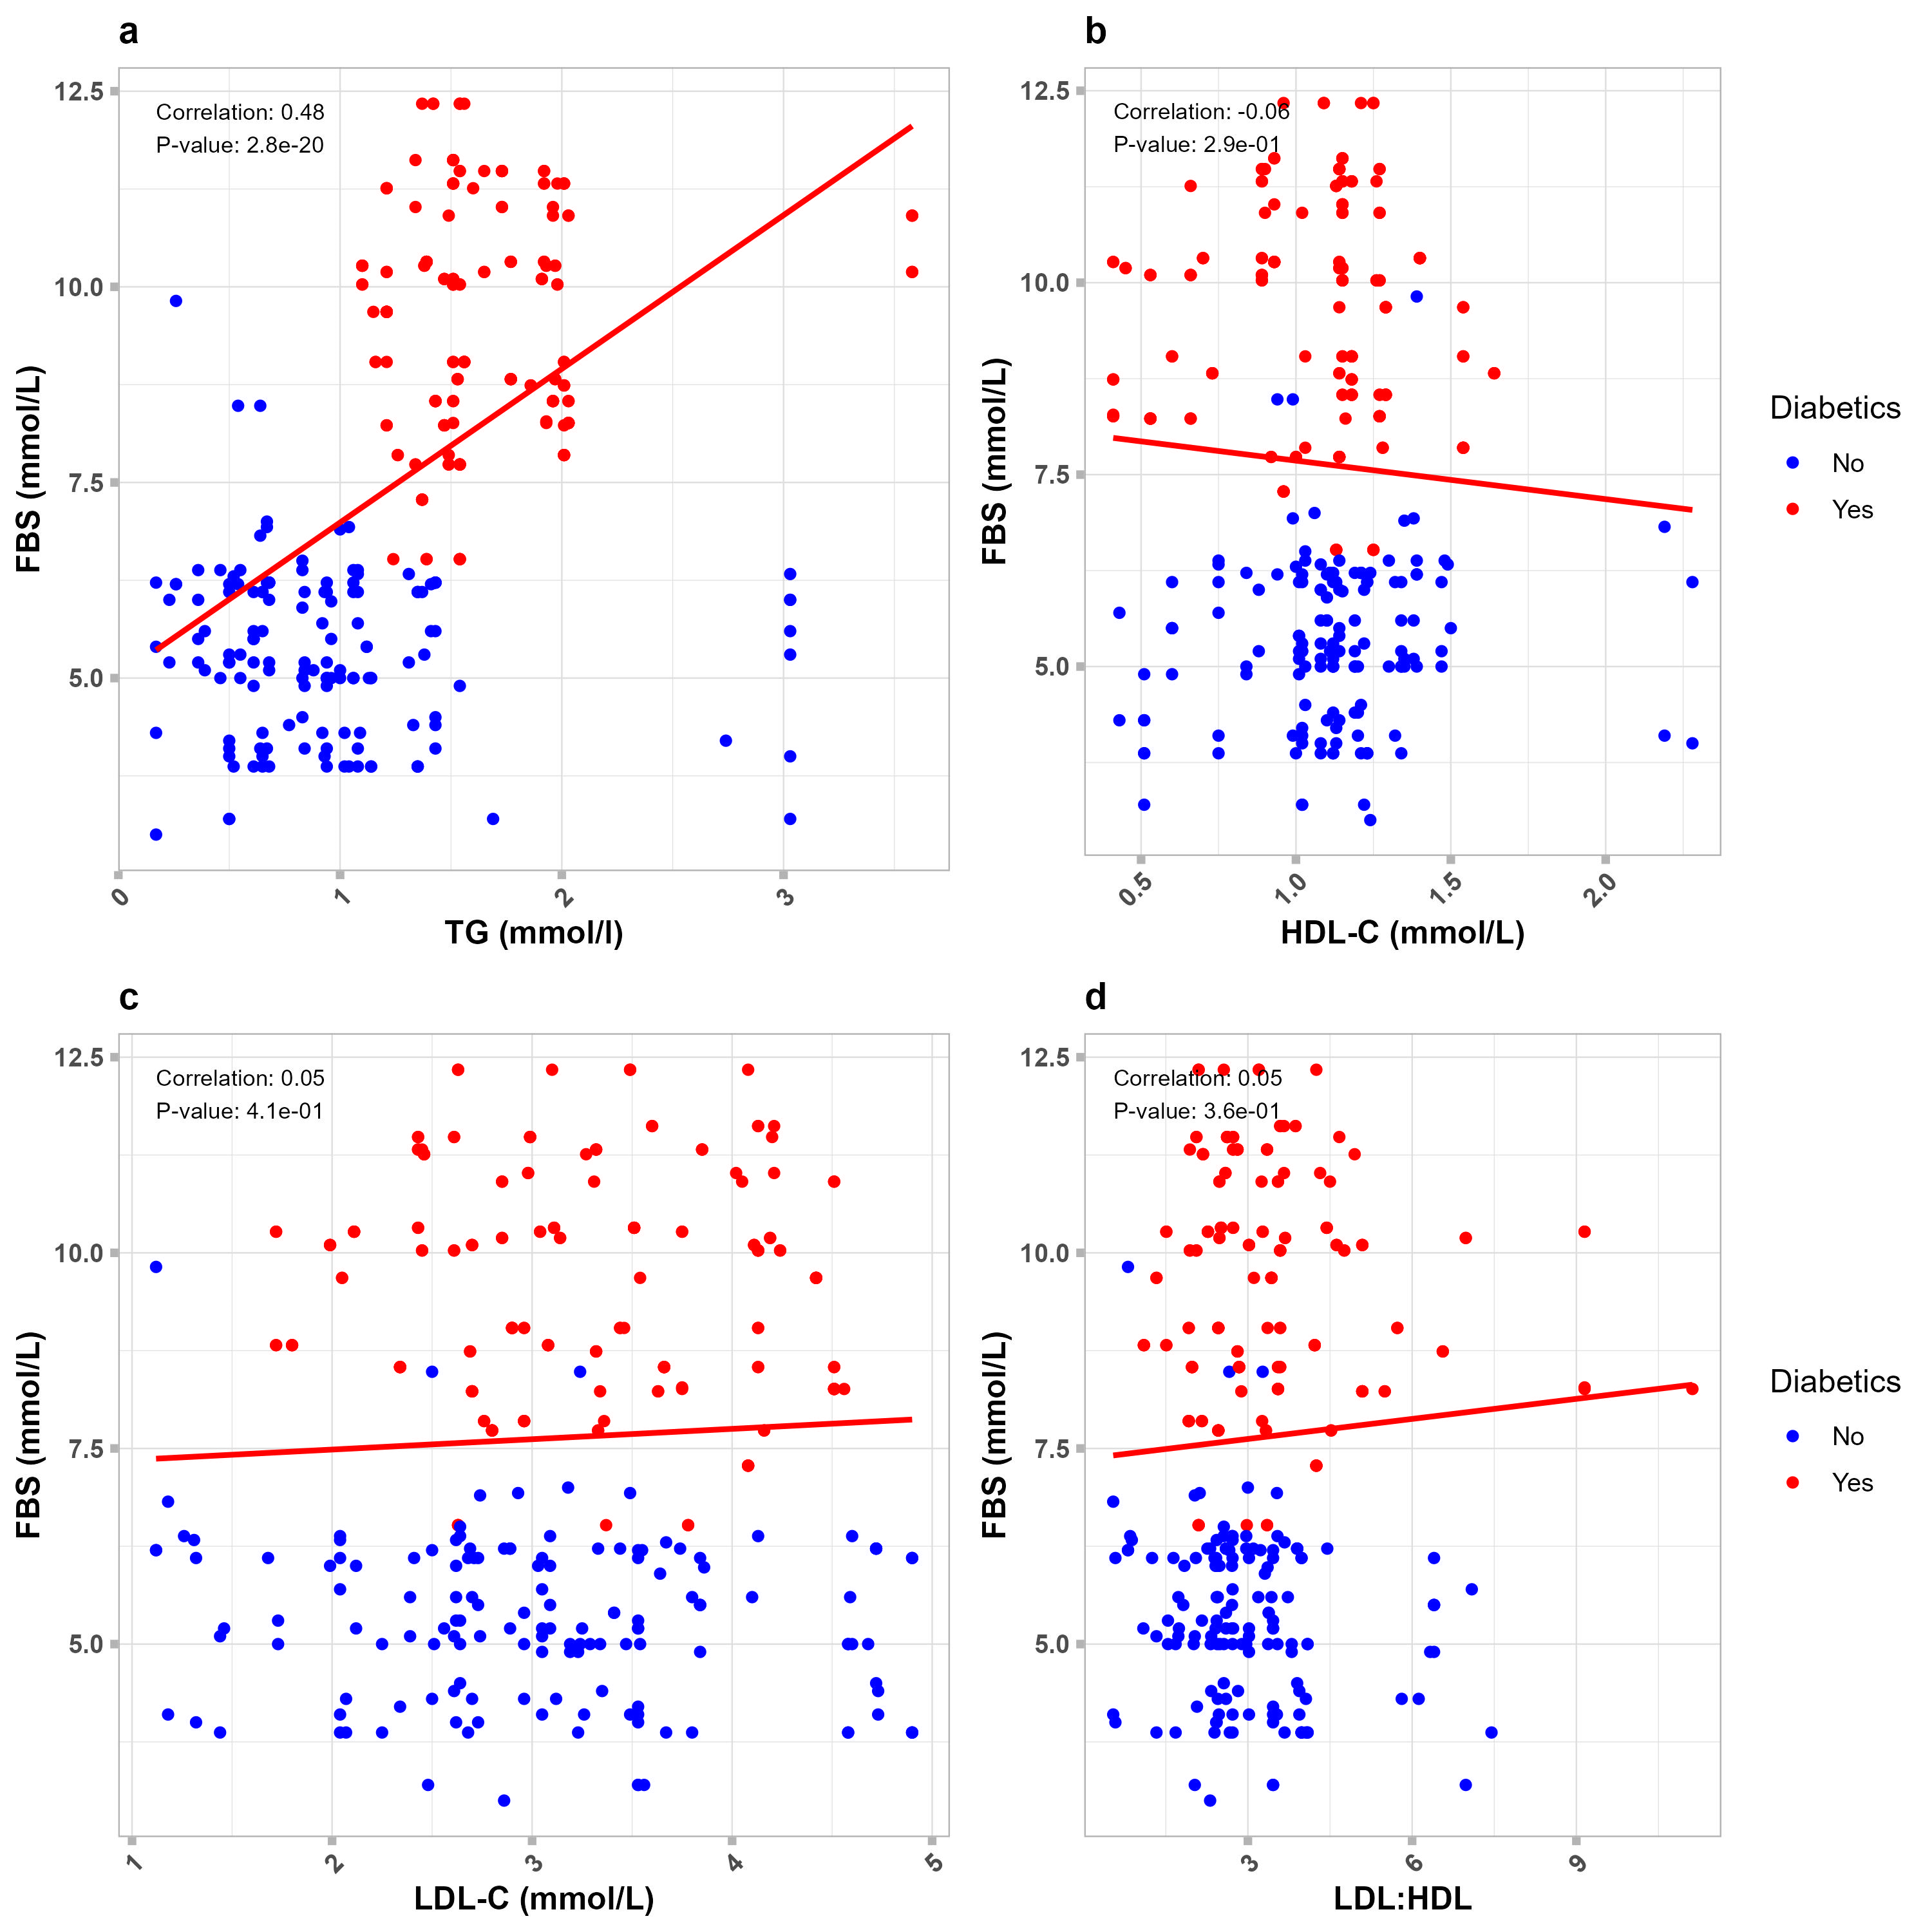


**Fig.2b. Showing the correlation between type 2 diabetes (in Female Patients) as measured by FBS and some lipids at the optimum level of Non-HDL-c**


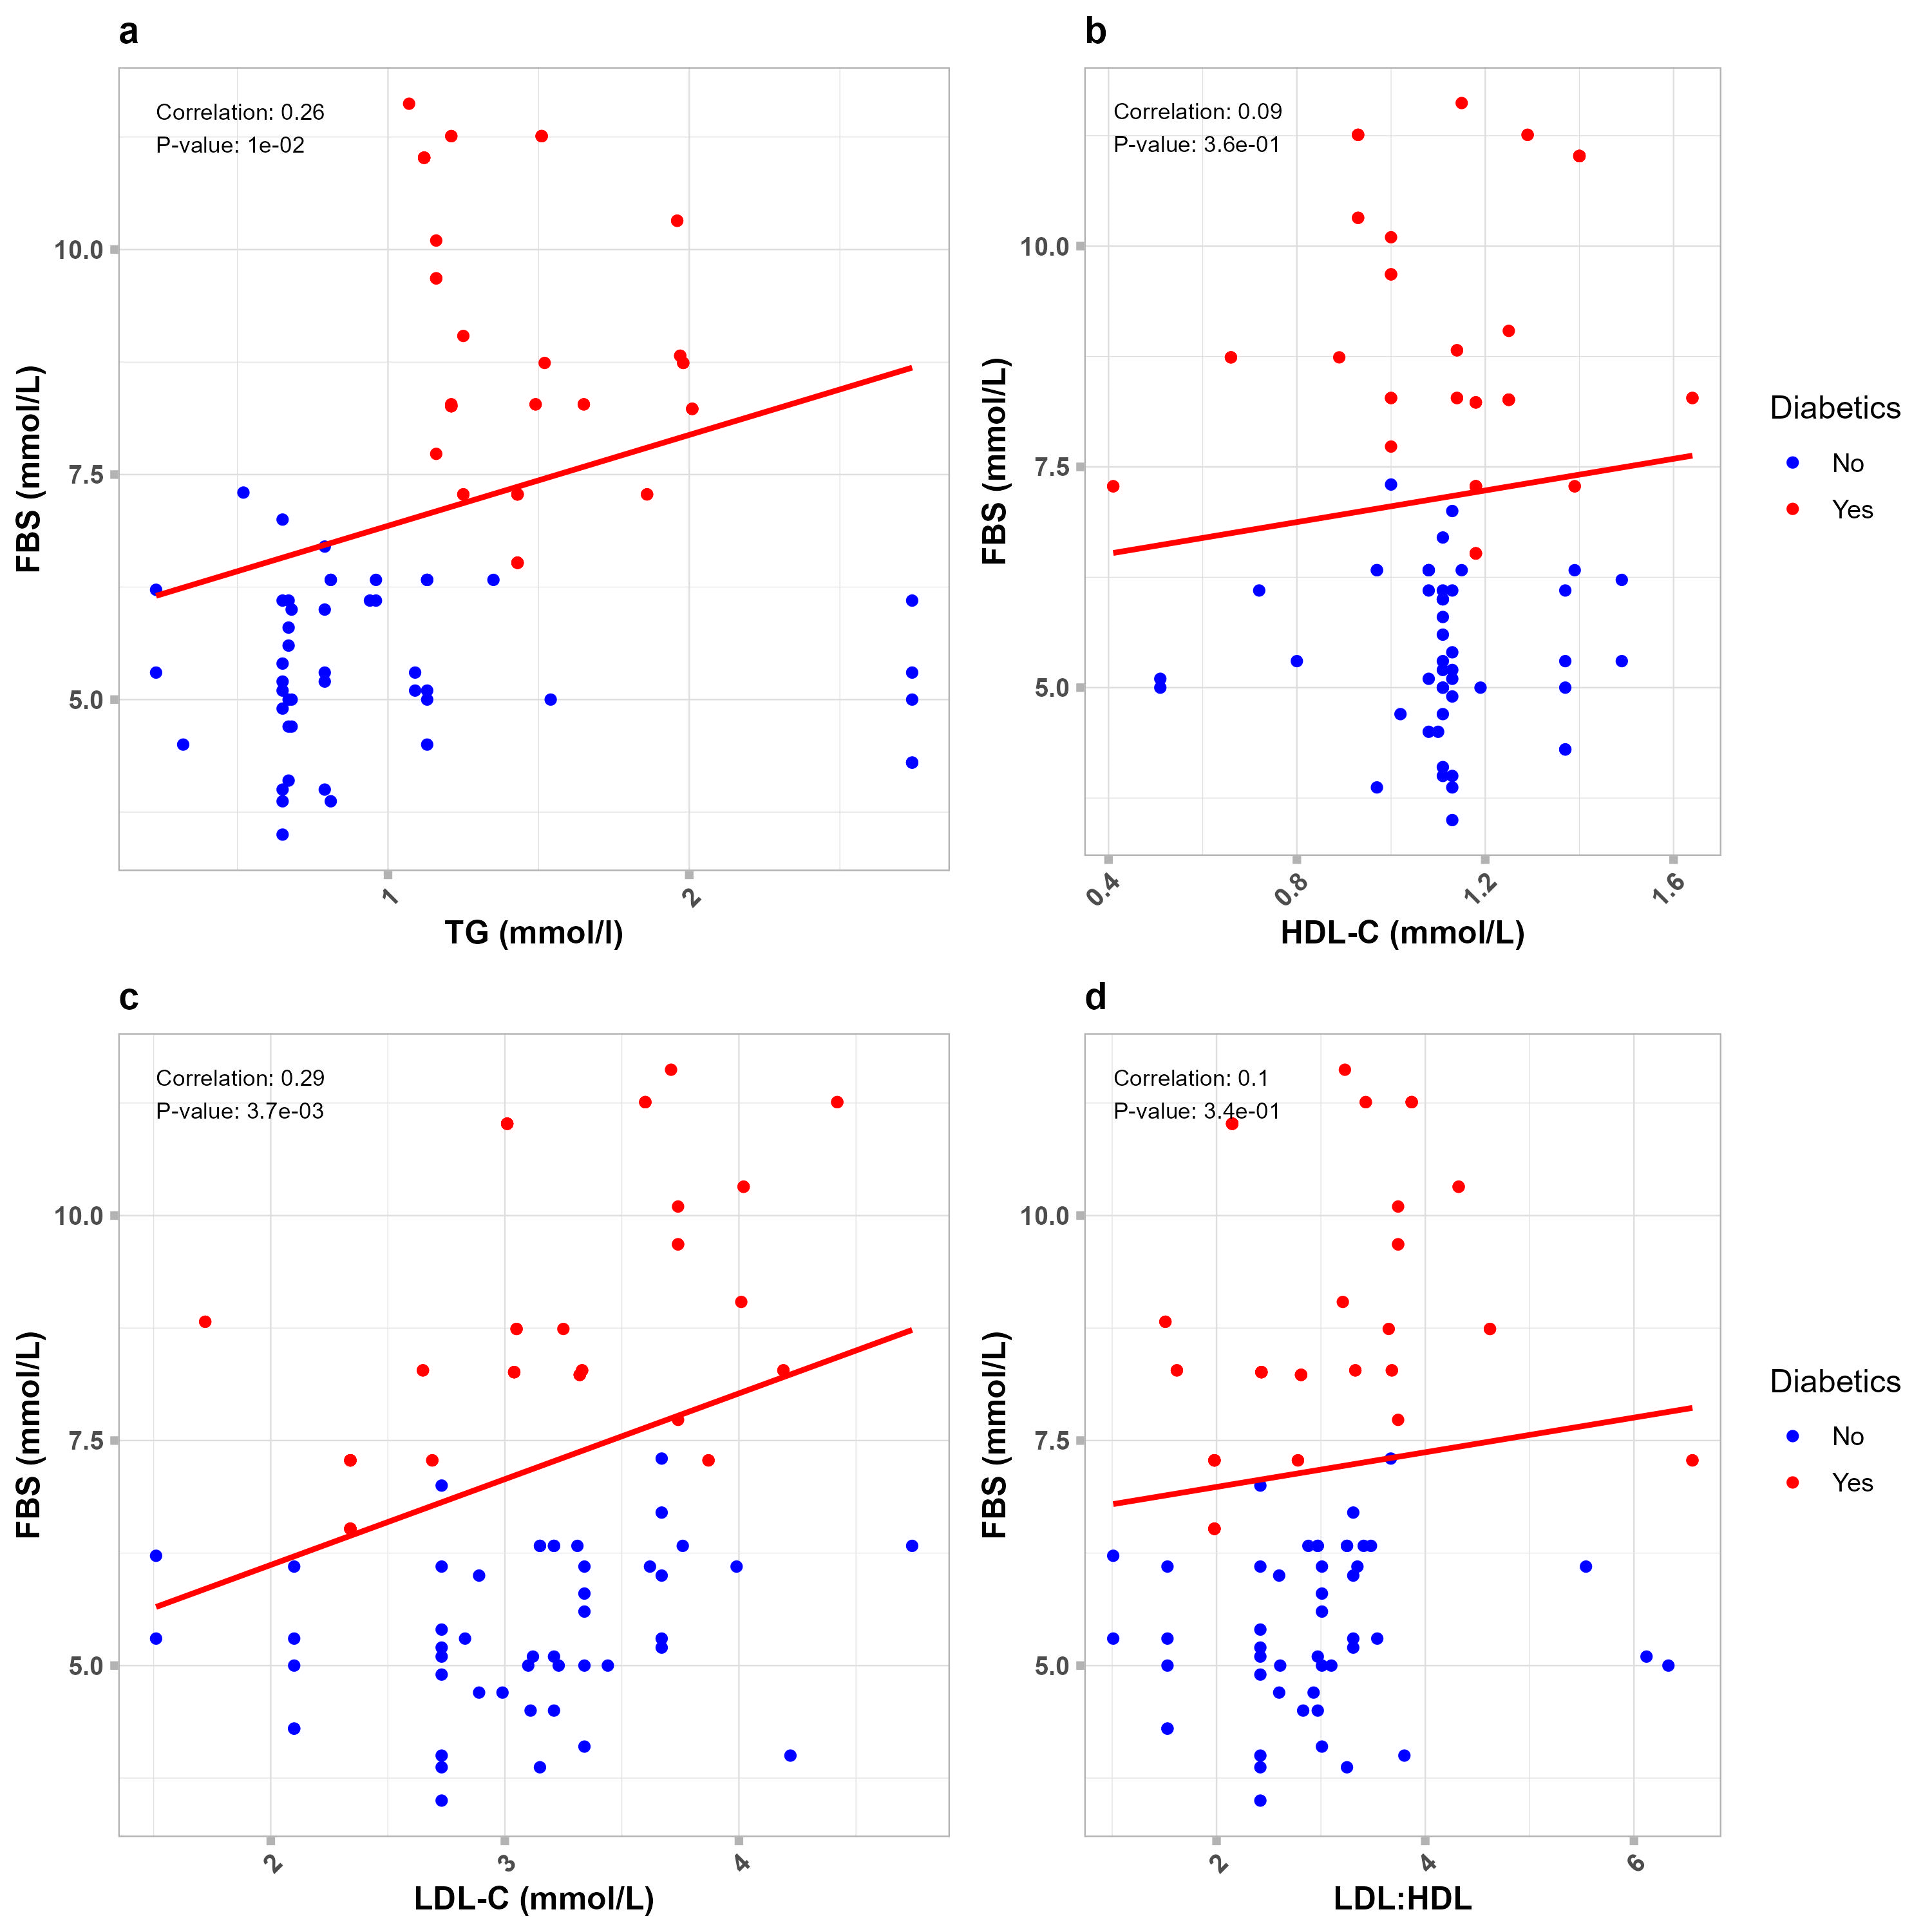


**Fig.2c. Showing the correlation between type 2 diabetes (in Male Patients) as measured by FBS and some lipids at the optimum level of Non-HDL-c**


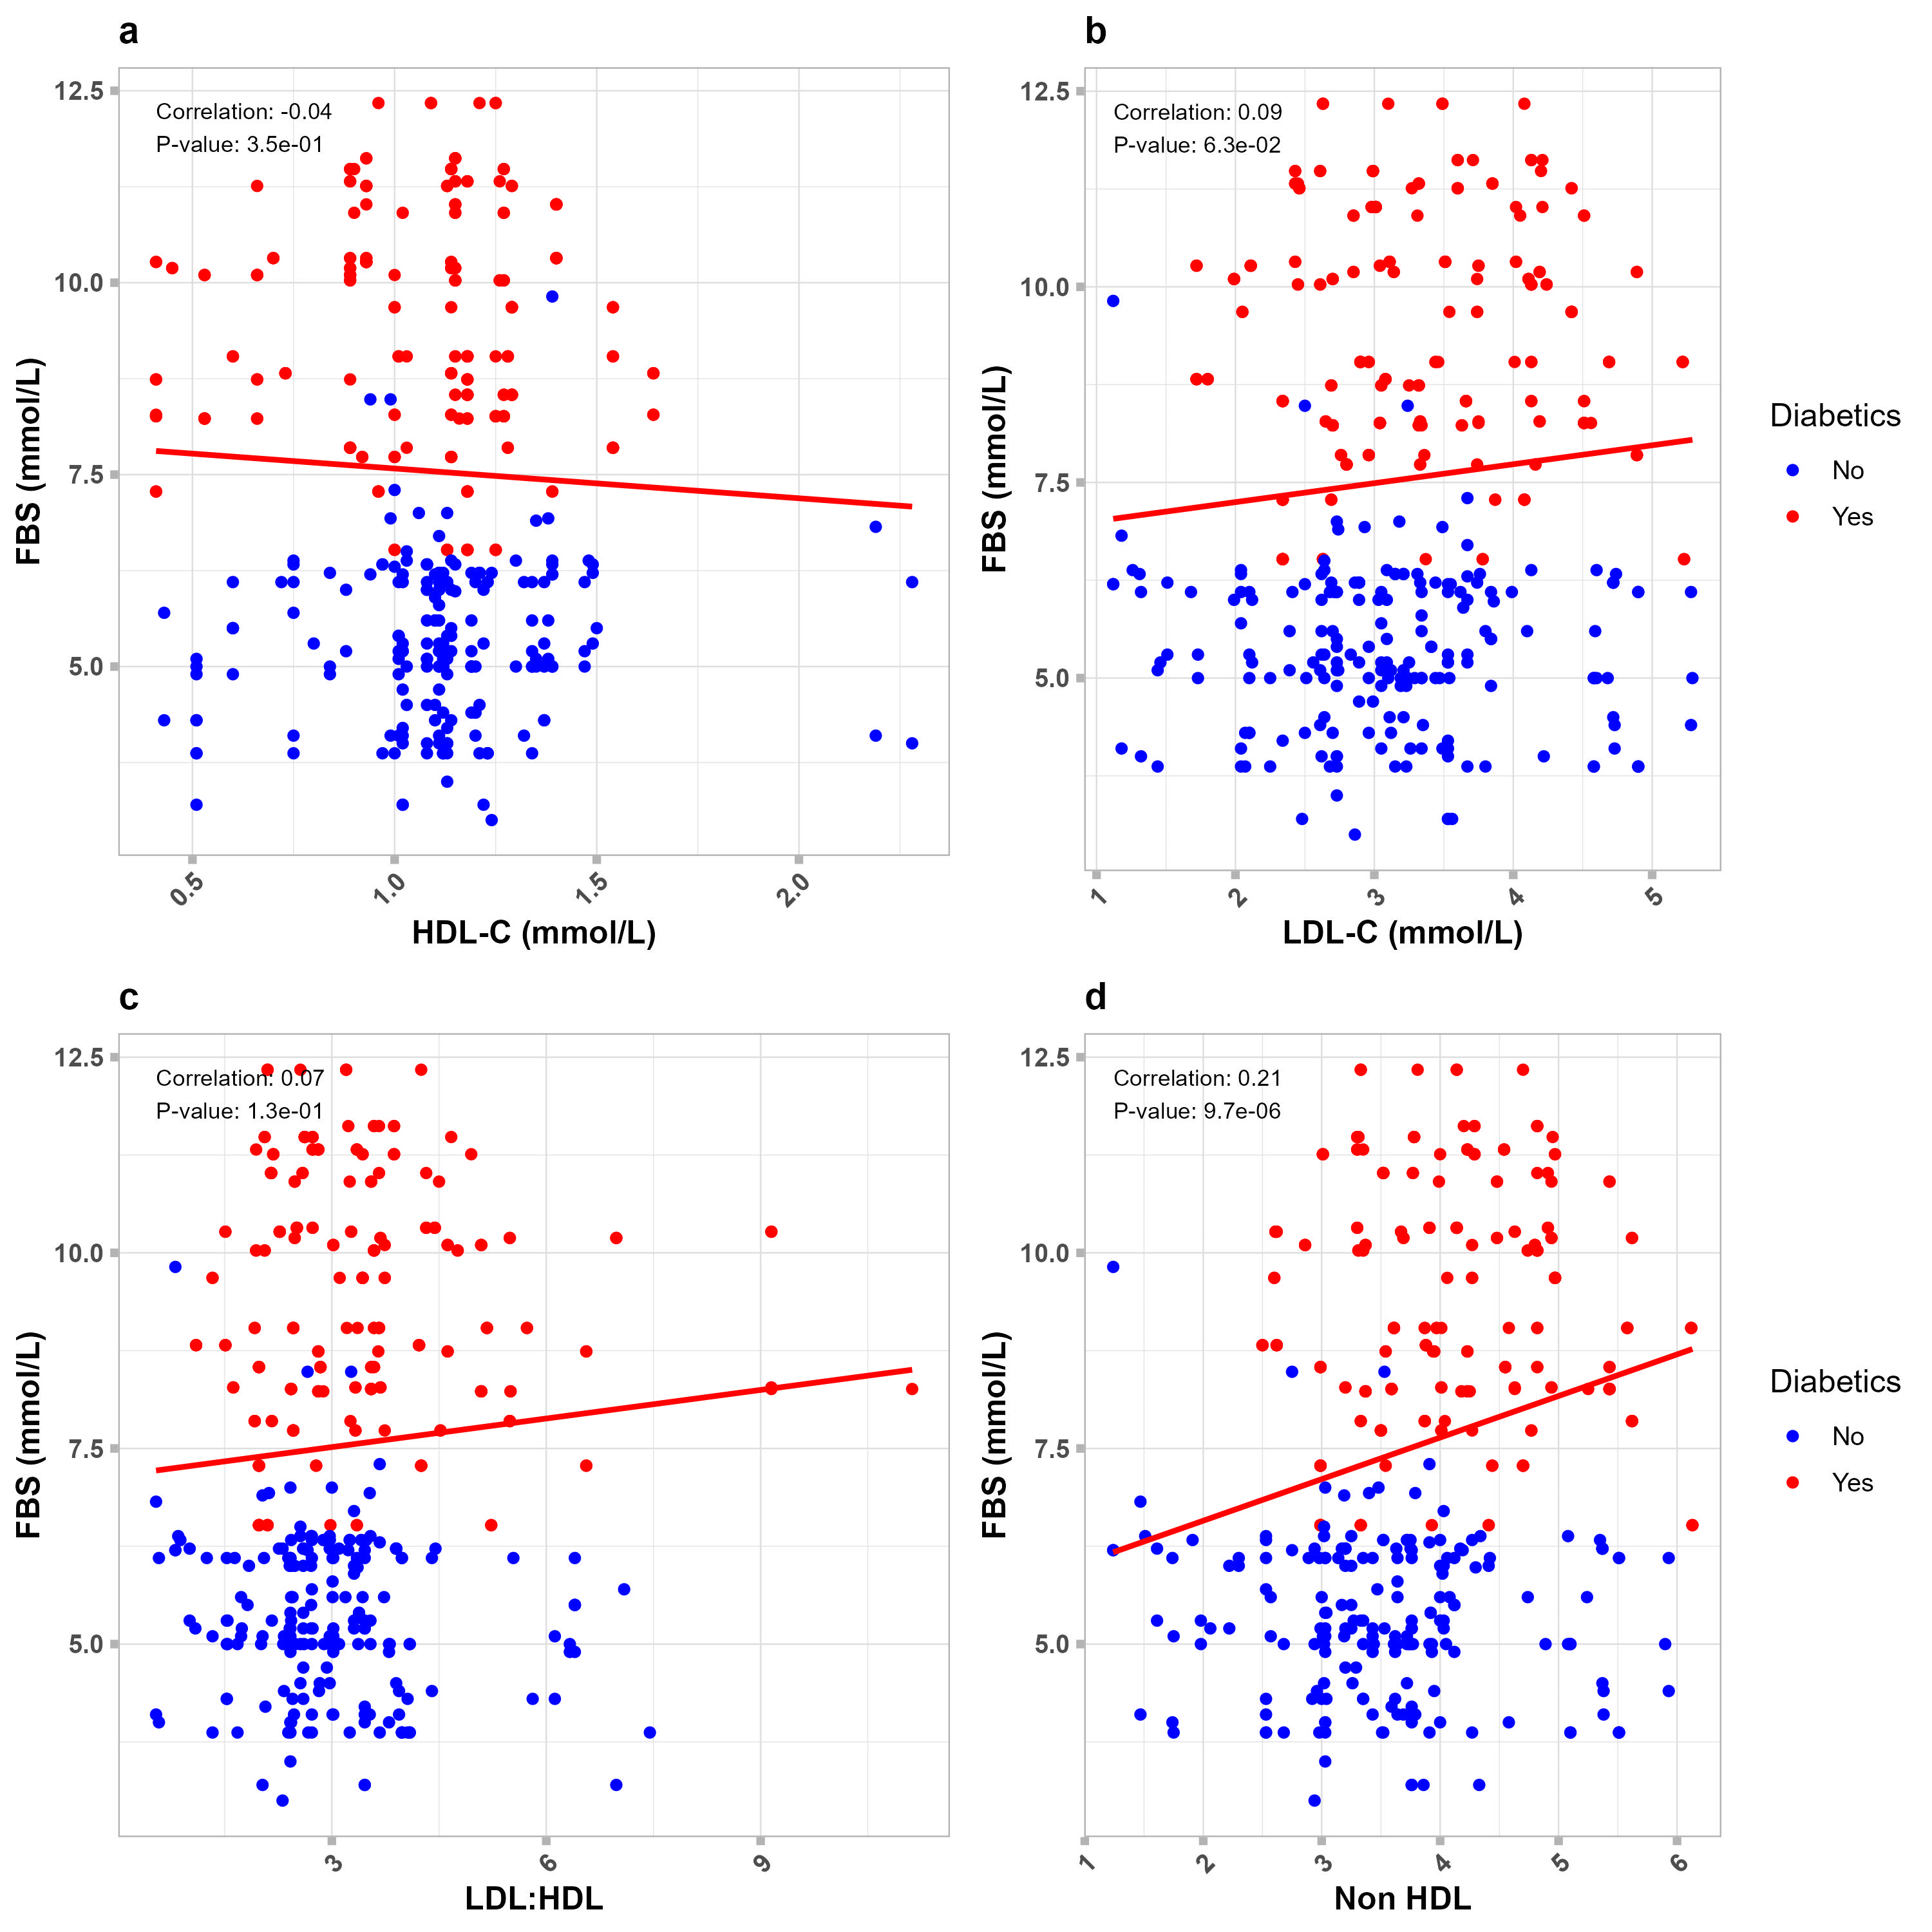


**Fig.3a. Showing the correlation between type-2 diabetes as measured by FBS and some lipids at the optimum level of TG**


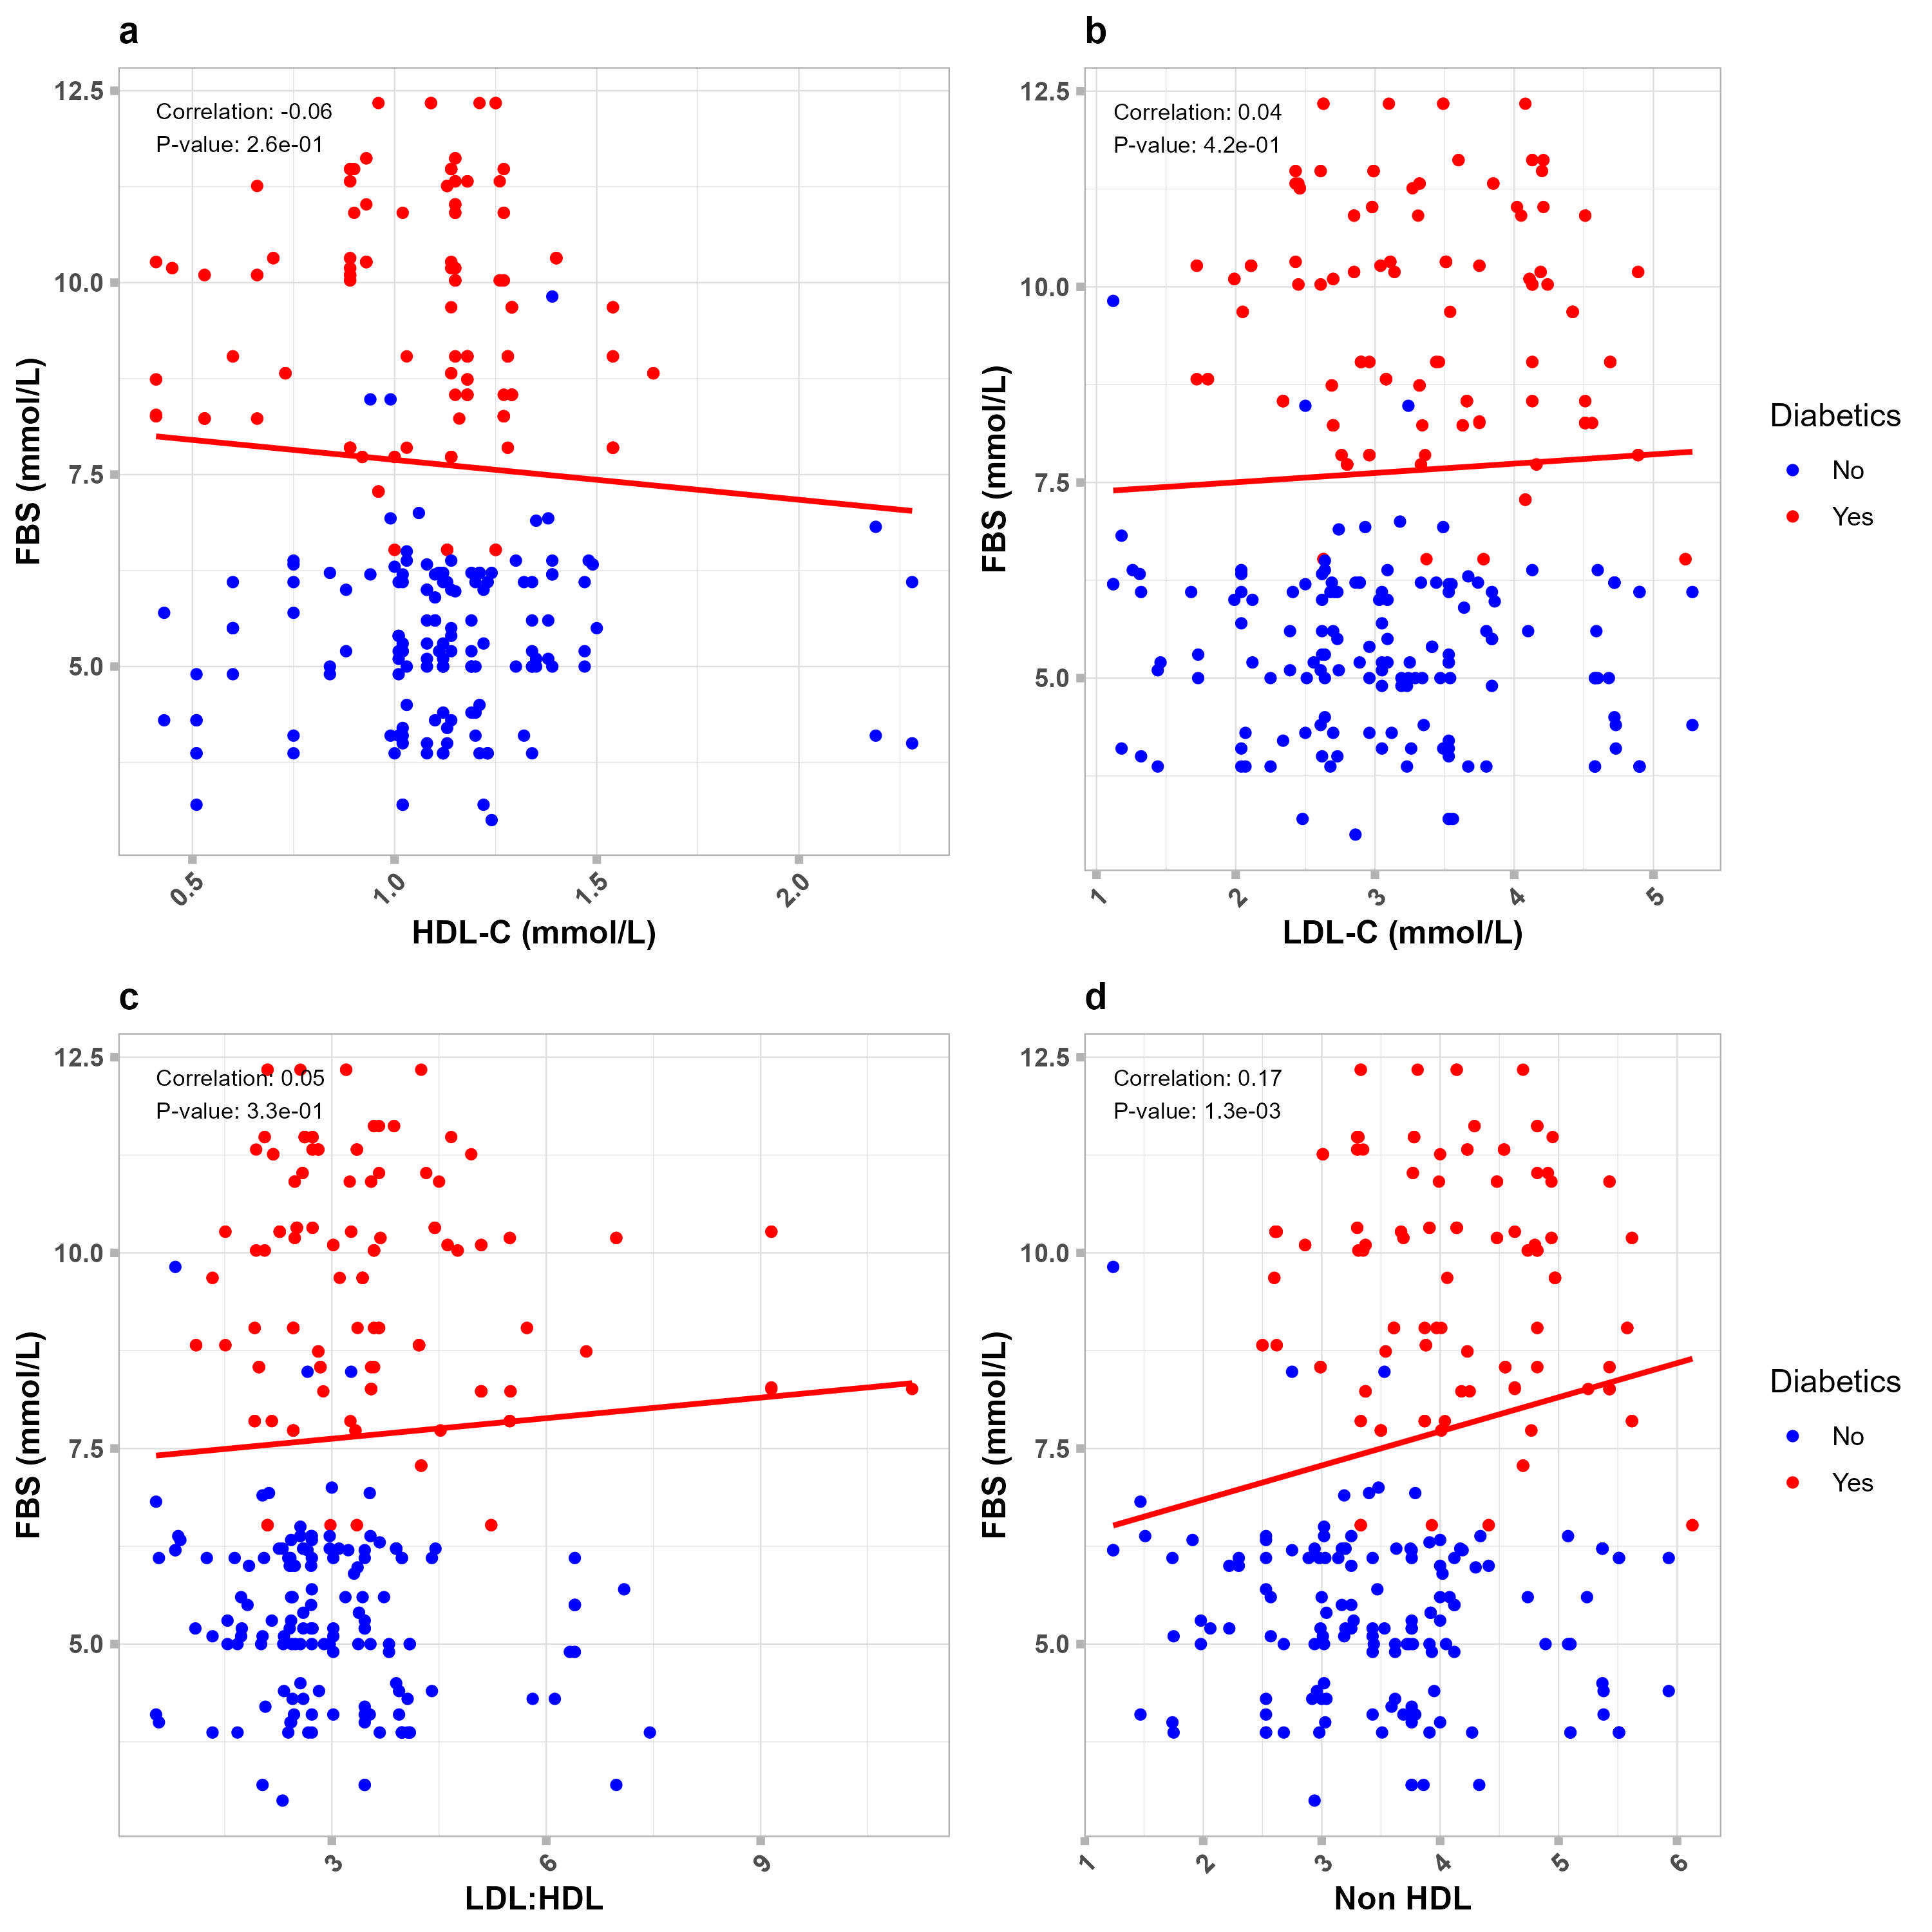


**Fig.3b. Showing the correlation between type 2 diabetes (in Female Patients) as measured by FBS and some lipids at the optimum level of TG**


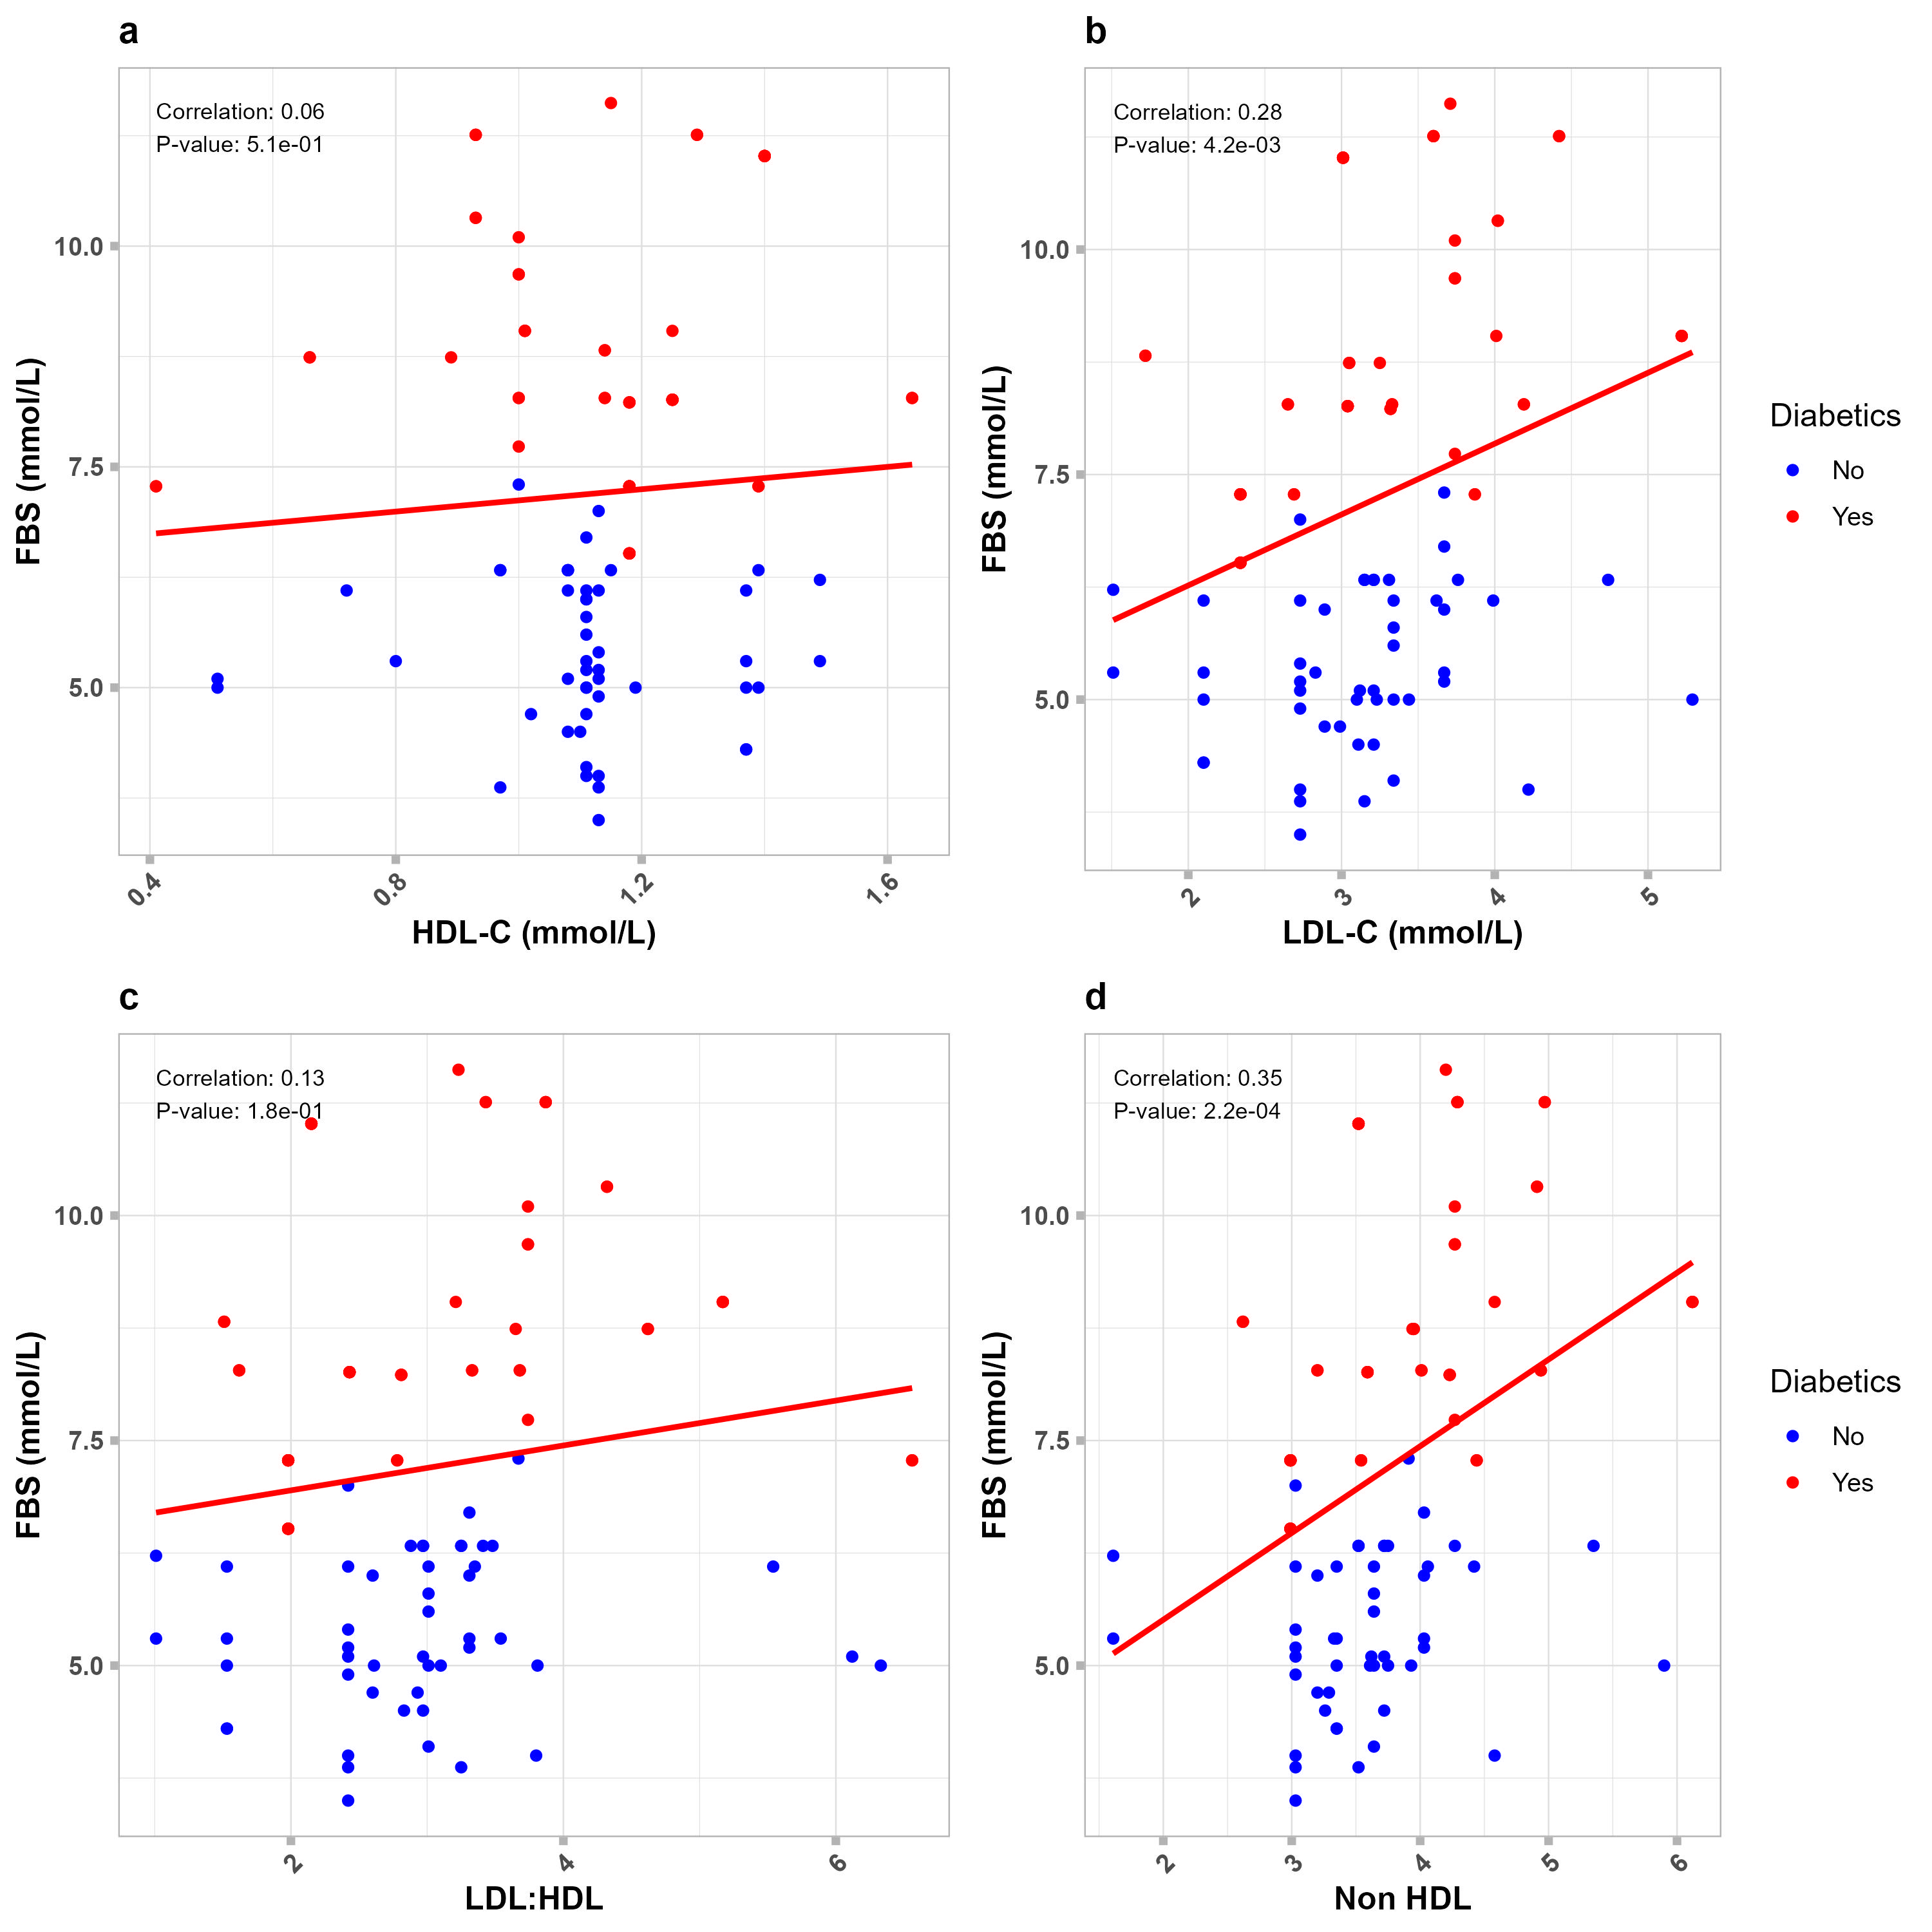


**Fig.3c. Showing the correlation between type 2 diabetes (in Male Patients) as measured by FBS and some lipids at the optimum level of TG**
